# Supplementary material for: Anti-Rheumatic Properties of Gentiopicroside Are Associated With Suppression of ROS-NF-κB-NLRP3 Axis in Fibroblast-Like Synoviocytes and NF-κB Pathway in Adjuvant-Induced Arthritis
Source: PubMed Central journal article supplement (PMC7232611; doi:10.3389/fphar.2020.00515), 2020-05-04

The original western blots of each figure.

Figure 5A

I $\kappa$ B $\alpha$ : Control, AIA, AIA+Dex(0.2mg/kg), AIA+Gent(100mg/kg),  
AIA+Gent(200mg/kg)

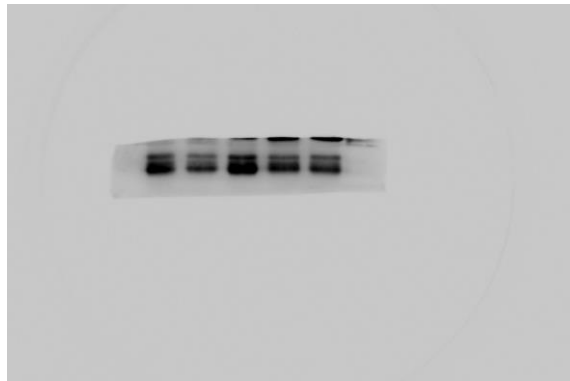

$\beta$ -actin: Control, AIA, AIA+Dex(0.2mg/kg), AIA+Gent(100mg/kg),  
AIA+Gent(200mg/kg)

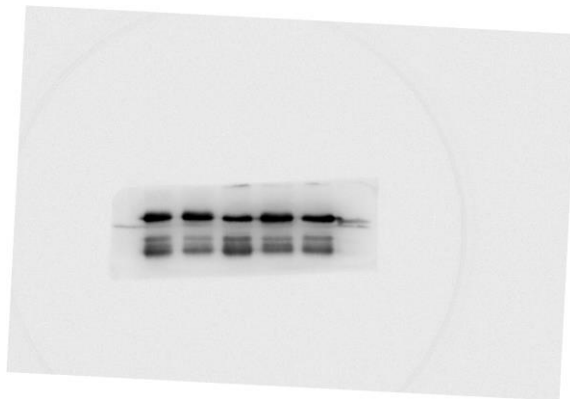

Figure 5B

p-I $\kappa$ B $\alpha$ : Control, AIA, AIA+Dex(0.2mg/kg), AIA+Gent(100mg/kg),  
AIA+Gent(200mg/kg)

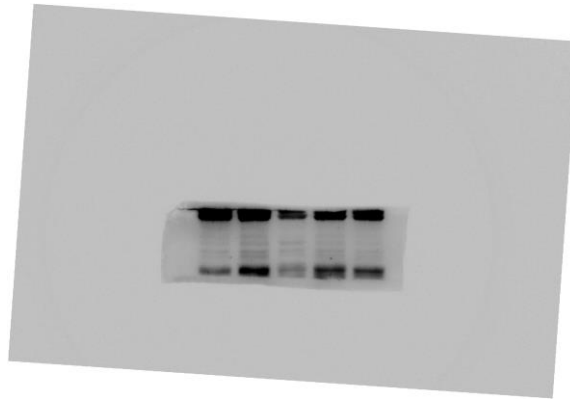

$\beta$ -actin: Control, AIA, AIA+Dex(0.2mg/kg), AIA+Gent(100mg/kg),  
AIA+Gent(200mg/kg)

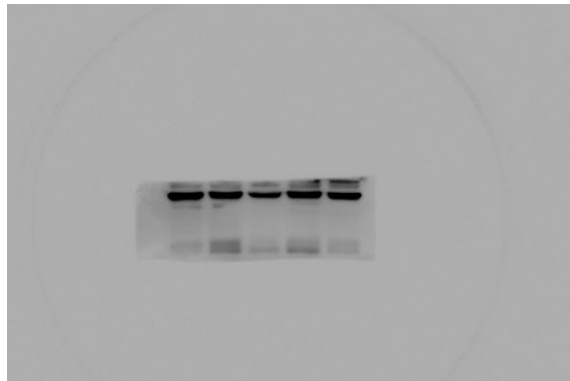

Figure 5C

p65: Control, AIA, AIA+Dex(0.2mg/kg), AIA+Gent(100mg/kg),  
AIA+Gent(200mg/kg)

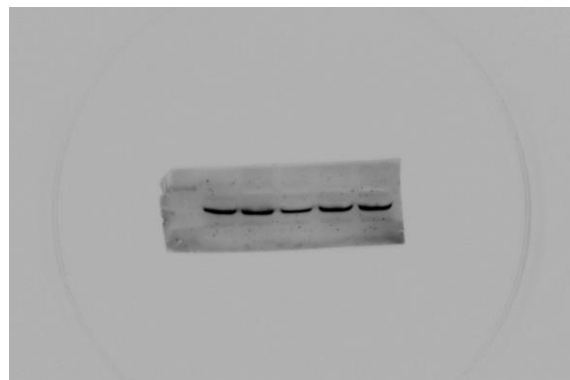

$\beta$ -actin: Control, AIA, AIA+Dex(0.2mg/kg), AIA+Gent(100mg/kg),

AIA+Gent(200mg/kg)

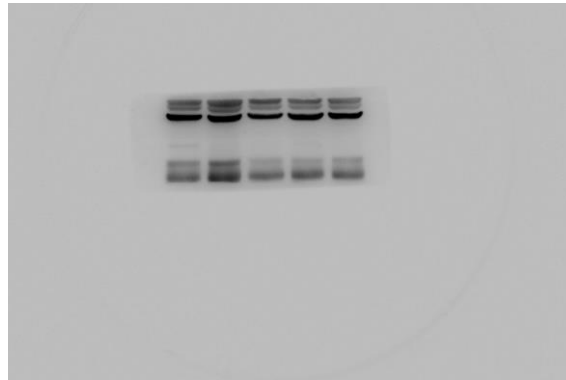

Figure 5D

p-p65: Control, AIA, AIA+Dex(0.2mg/kg), AIA+Gent(100mg/kg),  
AIA+Gent(200mg/kg)

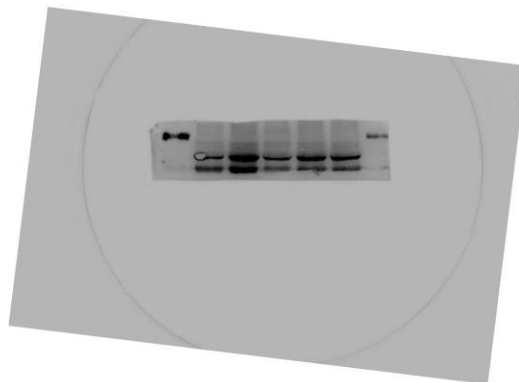

$\beta$ -actin: Control, AIA, AIA+Dex(0.2mg/kg), AIA+Gent(100mg/kg),  
AIA+Gent(200mg/kg)

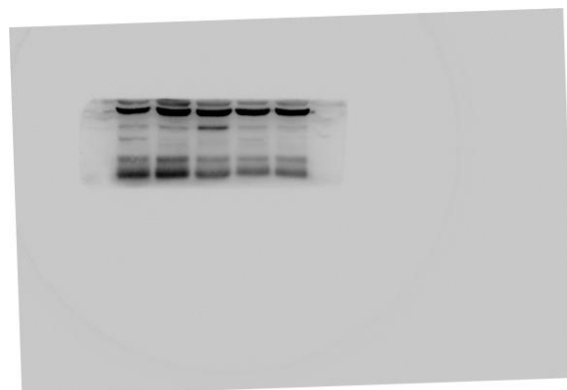

Figure 9C

p-I $\kappa$ B $\alpha$ : Control, TNF- $\alpha$ , TNF- $\alpha$ +Dex(50nM), TNF- $\alpha$ +Gent(25 $\mu$ M), TNF- $\alpha$ +Gent(50 $\mu$ M), TNF- $\alpha$ +Gent(100 $\mu$ M)

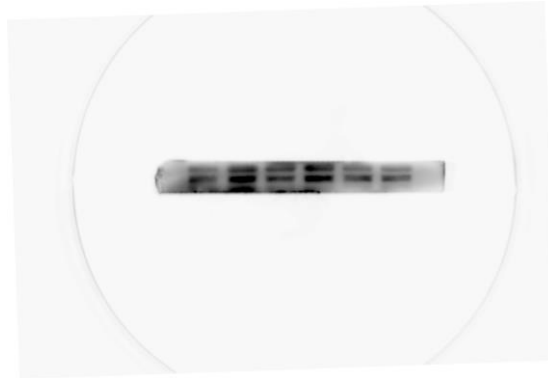

GAPDH: Control, TNF- $\alpha$ , TNF- $\alpha$ +Dex(50nM), TNF- $\alpha$ +Gent(25 $\mu$ M), TNF- $\alpha$ +Gent(50 $\mu$ M), TNF- $\alpha$ +Gent(100 $\mu$ M)

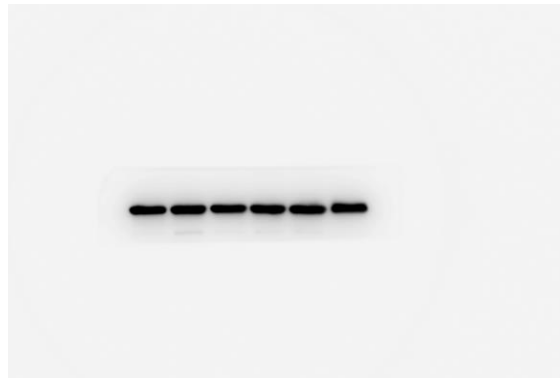

p65: Control, TNF- $\alpha$ , TNF- $\alpha$ +Dex(50nM), TNF- $\alpha$ +Gent(25 $\mu$ M), TNF- $\alpha$ +Gent(50 $\mu$ M), TNF- $\alpha$ +Gent(100 $\mu$ M)

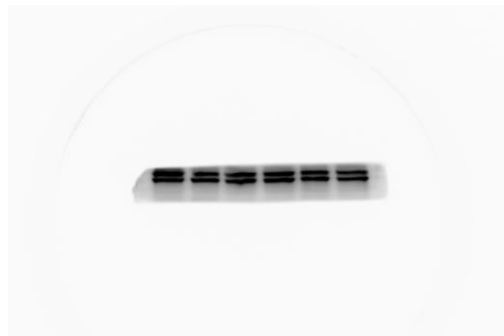

GAPDH: Control, TNF- $\alpha$ , TNF- $\alpha$ +Dex(50nM), TNF- $\alpha$ +Gent(25 $\mu$ M), TNF-

$\alpha$ +Gent(50 $\mu$ M), TNF- $\alpha$ +Gent(100 $\mu$ M)

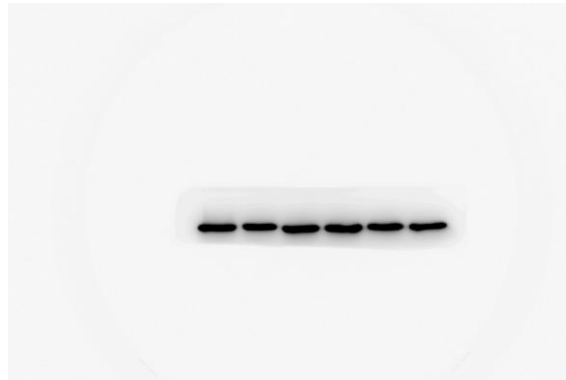

p-p65: Control, TNF- $\alpha$ , TNF- $\alpha$ +Dex(50nM), TNF- $\alpha$ +Gent(25 $\mu$ M), TNF- $\alpha$ +Gent(50 $\mu$ M), TNF- $\alpha$ +Gent(100 $\mu$ M)

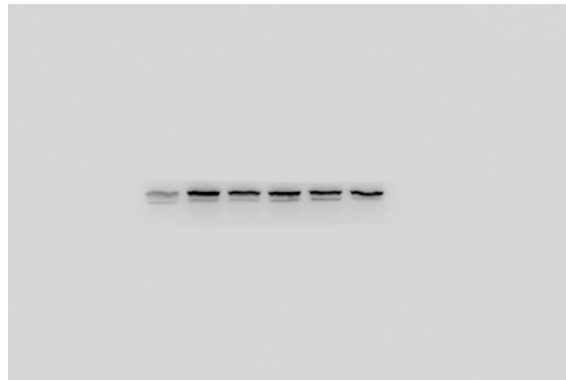

GAPDH: Control, TNF- $\alpha$ , TNF- $\alpha$ +Dex(50nM), TNF- $\alpha$ +Gent(25 $\mu$ M), TNF- $\alpha$ +Gent(50 $\mu$ M), TNF- $\alpha$ +Gent(100 $\mu$ M)

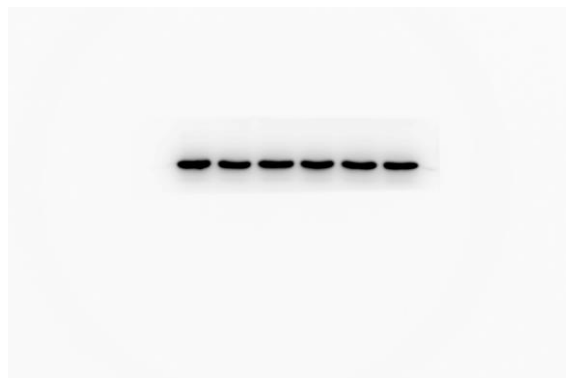

Figure 10C

NLRP3: Control, TNF- $\alpha$ , TNF- $\alpha$ +Dex(50nM), TNF- $\alpha$ +Gent(25 $\mu$ M), TNF- $\alpha$ +Gent(50 $\mu$ M), TNF- $\alpha$ +Gent(100 $\mu$ M)

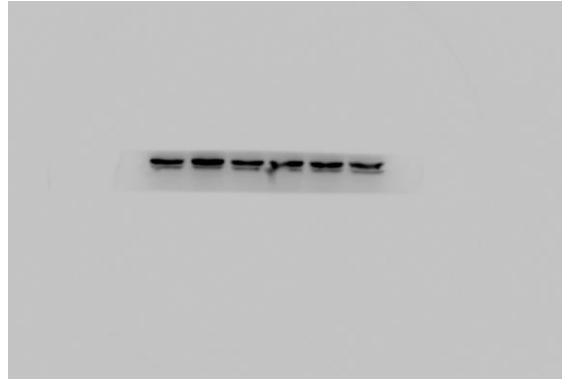

GAPDH: Control, TNF- $\alpha$ , TNF- $\alpha$ +Dex(50nM), TNF- $\alpha$ +Gent(25 $\mu$ M), TNF- $\alpha$ +Gent(50 $\mu$ M), TNF- $\alpha$ +Gent(100 $\mu$ M)

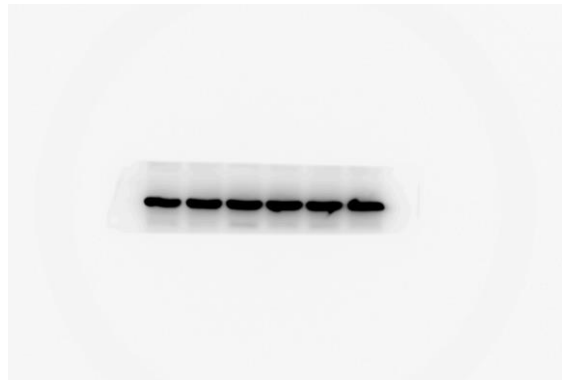

ASC: Control, TNF- $\alpha$ , TNF- $\alpha$ +Dex(50nM), TNF- $\alpha$ +Gent(25 $\mu$ M), TNF- $\alpha$ +Gent(50 $\mu$ M), TNF- $\alpha$ +Gent(100 $\mu$ M)

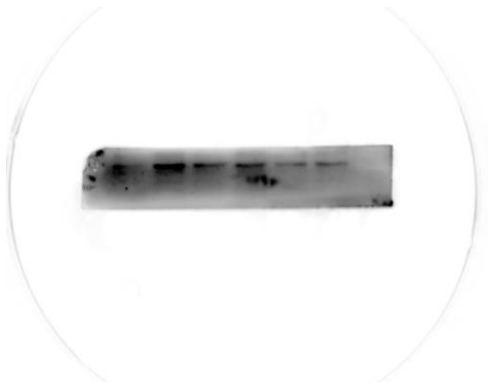

GAPDH: Control, TNF- $\alpha$ , TNF- $\alpha$ +Dex(50nM), TNF- $\alpha$ +Gent(25 $\mu$ M), TNF- $\alpha$ +Gent(50 $\mu$ M), TNF- $\alpha$ +Gent(100 $\mu$ M)

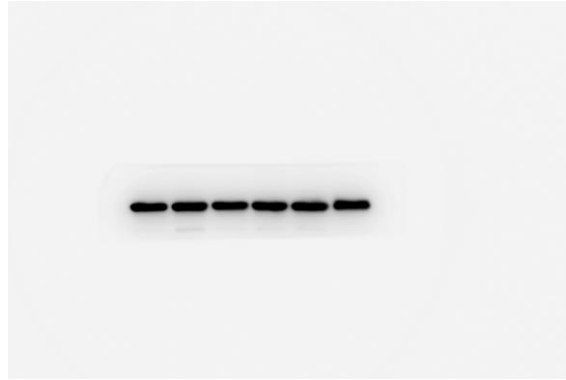

Caspase-1: Control, TNF- $\alpha$ , TNF- $\alpha$ +Dex(50nM), TNF- $\alpha$ +Gent(25 $\mu$ M), TNF- $\alpha$ +Gent(50 $\mu$ M), TNF- $\alpha$ +Gent(100 $\mu$ M)

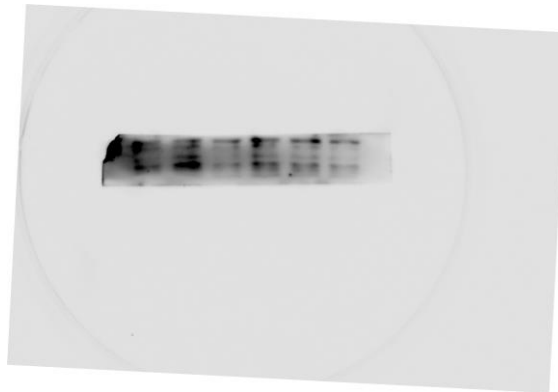

GAPDH: Control, TNF- $\alpha$ , TNF- $\alpha$ +Dex(50nM), TNF- $\alpha$ +Gent(25 $\mu$ M), TNF- $\alpha$ +Gent(50 $\mu$ M), TNF- $\alpha$ +Gent(100 $\mu$ M)

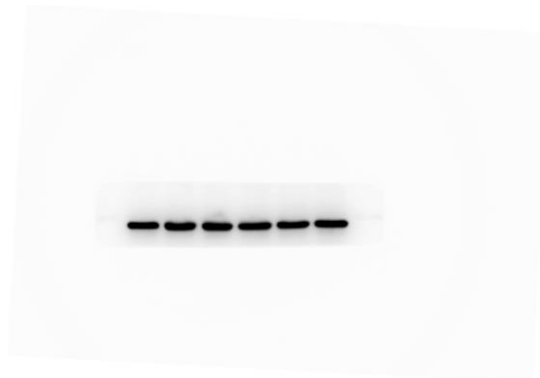

Supplement: DataSheet_2.pdf [file DataSheet_2.pdf]
