# Supplementary material for: Anti-Rheumatic Properties of Gentiopicroside Are Associated With Suppression of ROS-NF-κB-NLRP3 Axis in Fibroblast-Like Synoviocytes and NF-κB Pathway in Adjuvant-Induced Arthritis
Source: PubMed Central journal article supplement (PMC7232611; doi:10.3389/fphar.2020.00515), 2020-05-04

Figure 3A: The original figures of primary ankle joint

Control:

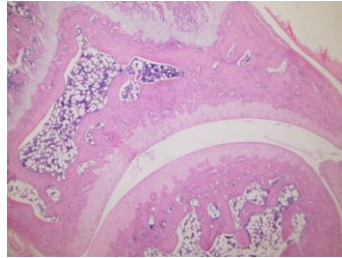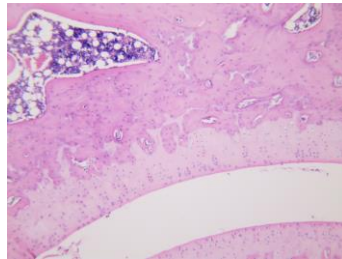

AIA:

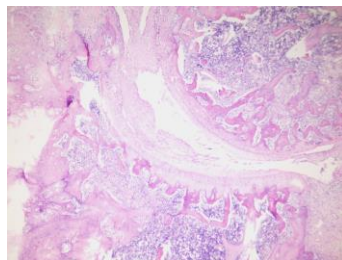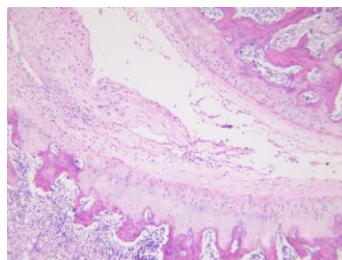

Dex 0.2 mg/kg:

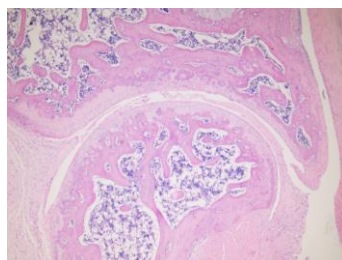

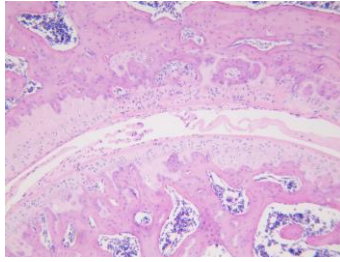

Gent 100 mg/kg:

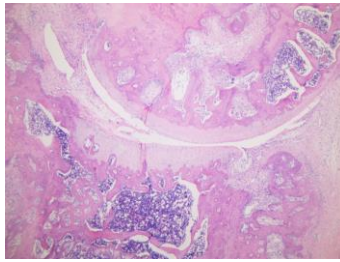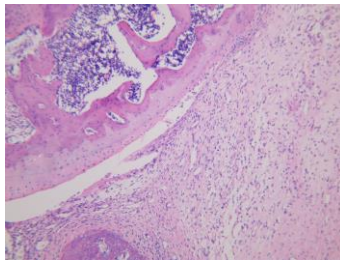

Gent 200 mg/kg:

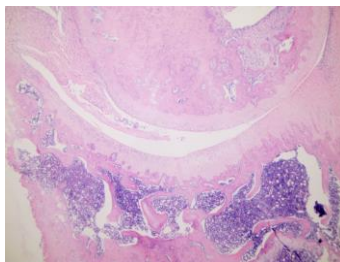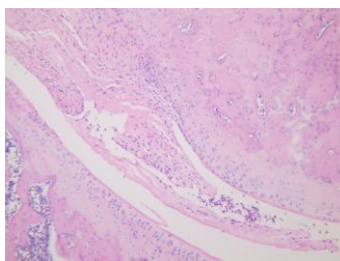

Figure 3B: The original figures of secondary ankle joint

Control:

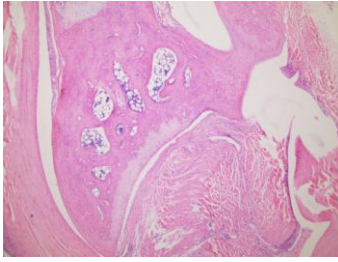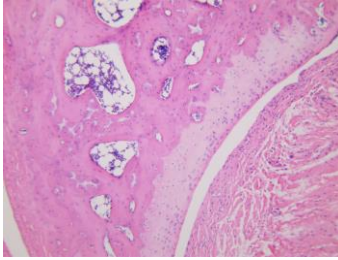

AIA:

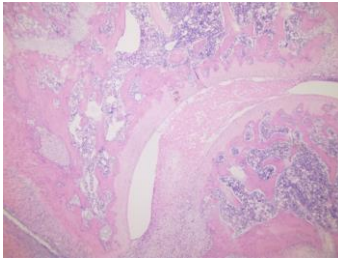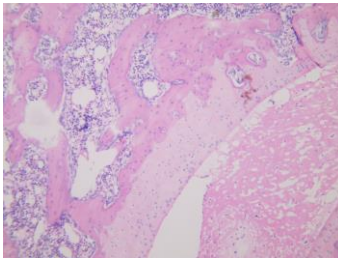

Dex 0.2 mg/kg:

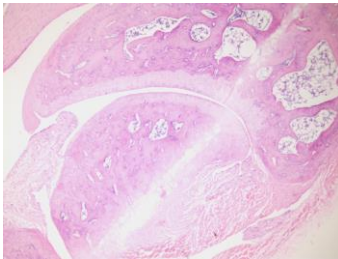

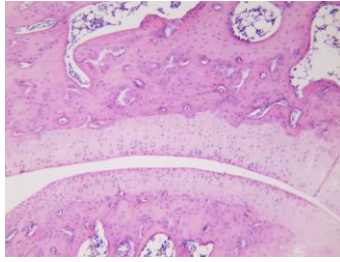

Gent 100 mg/kg:

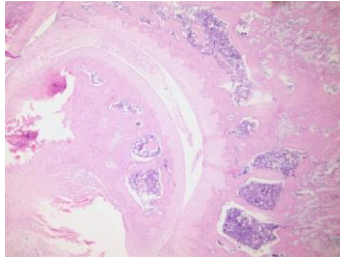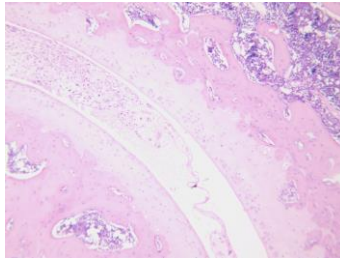

Gent 200 mg/kg:

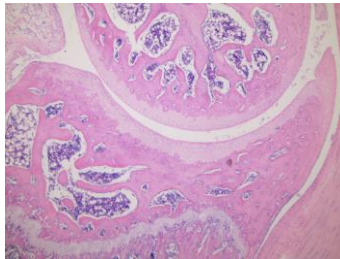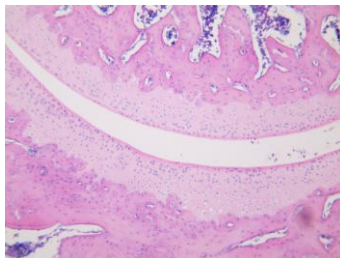

Figure 5: The original western blots of Figure 5

Figure 5A

I $\kappa$ B $\alpha$ : Control, AIA, Dex 0.2 mg/kg, Gent 100 mg/kg, Gent 200 mg/kg

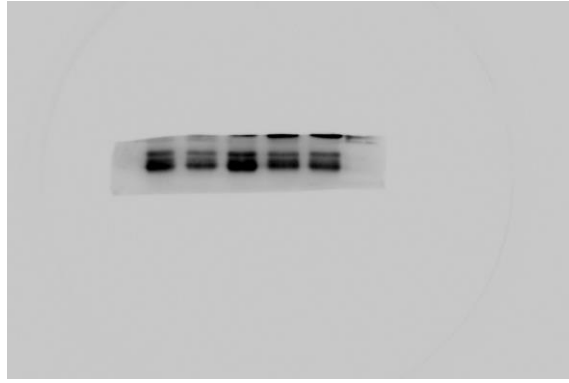

$\beta$ -actin: Control, AIA, Dex 0.2 mg/kg, Gent 100 mg/kg, Gent 200 mg/kg

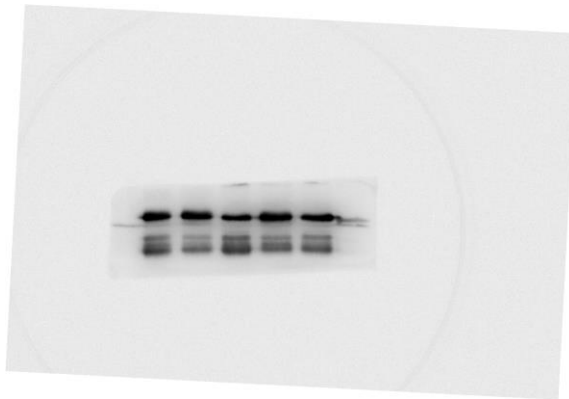

Figure 5B

p-I $\kappa$ B $\alpha$ : Control, AIA, Dex 0.2 mg/kg, Gent 100 mg/kg, Gent 200 mg/kg

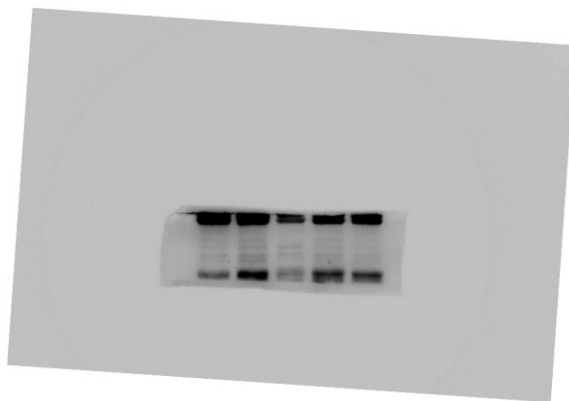

$\beta$ -actin: Control, AIA, Dex 0.2 mg/kg, Gent 100 mg/kg, Gent 200 mg/kg

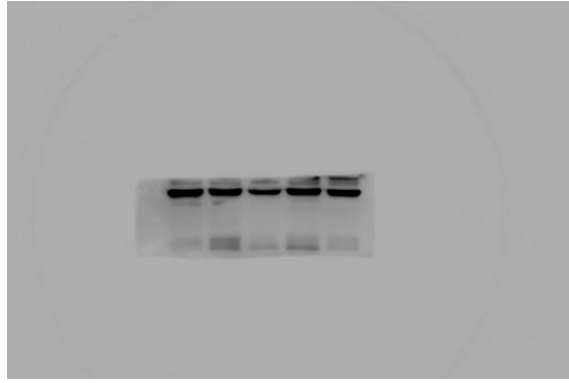

Figure 5C

p65: Control, AIA, Dex 0.2 mg/kg, Gent 100 mg/kg, Gent 200 mg/kg

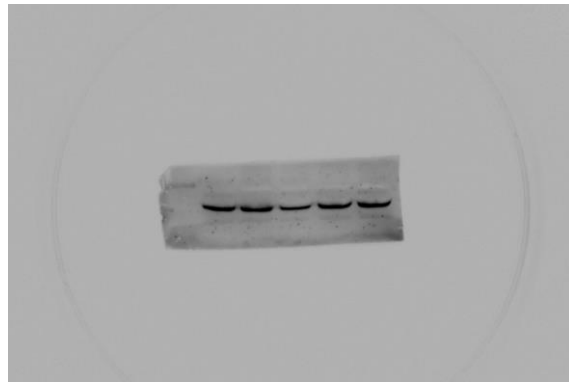

$\beta$ -actin: Control, AIA, Dex 0.2 mg/kg, Gent 100 mg/kg, Gent 200 mg/kg

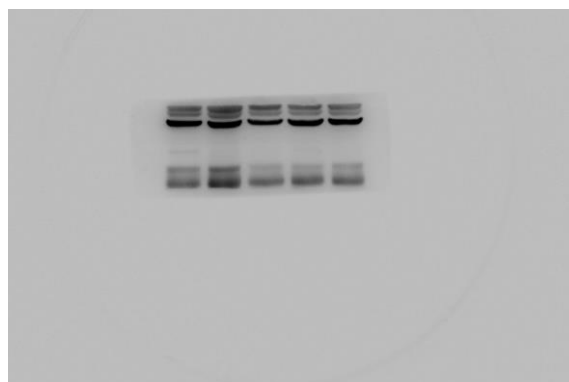

Figure 5D

p-p65: Control, AIA, Dex 0.2 mg/kg, Gent 100 mg/kg, Gent 200 mg/kg

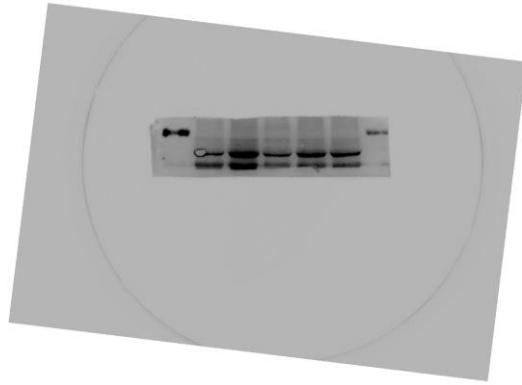

$\beta$ -actin: Control, AIA, Dex 0.2 mg/kg, Gent 100 mg/kg, Gent 200 mg/kg

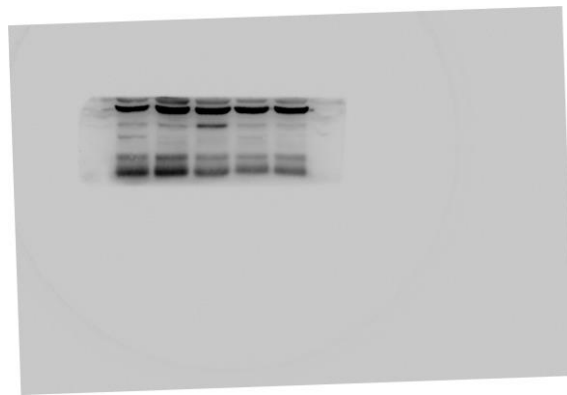

Figure 6A: The original figures of RA-FLS morphology

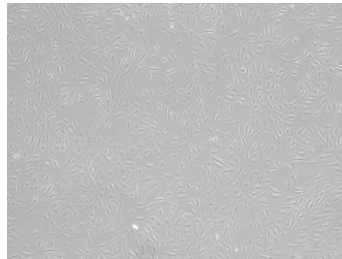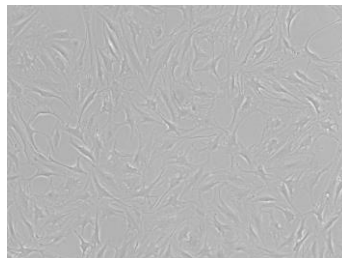

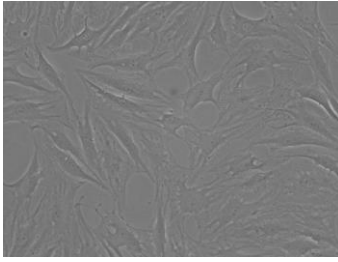

Figure 6B: The original figures of immunofluorescent staining

Vimentin:

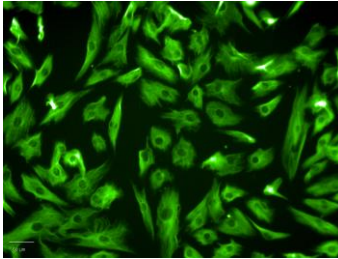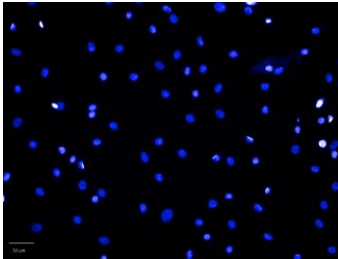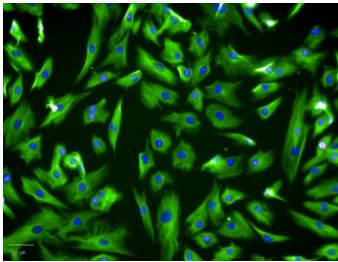

CD68:

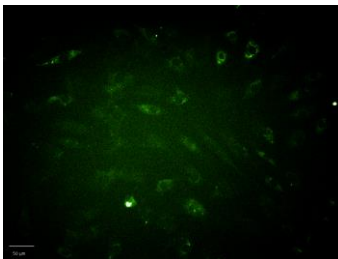



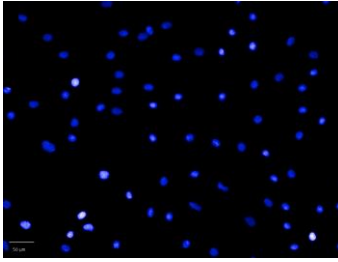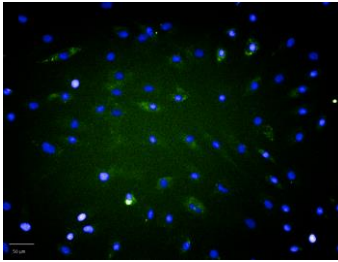

Figure 7C: The original figures of RA-FLS proliferation

Control:

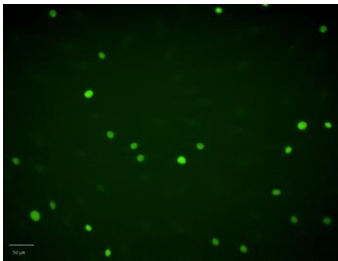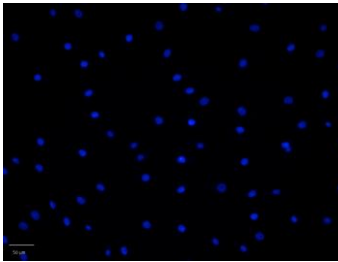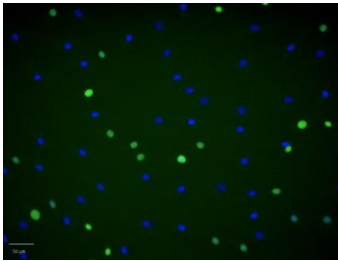

TNF- $\alpha$ :

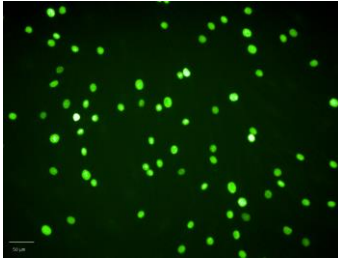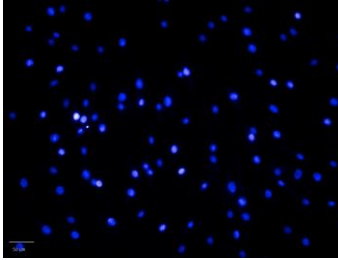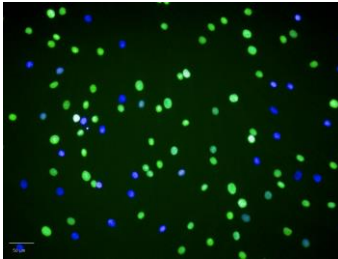

Dex 50 nM:

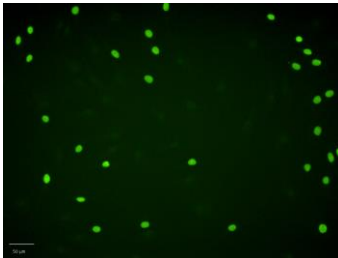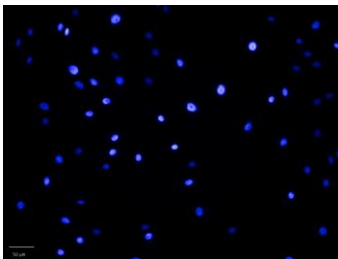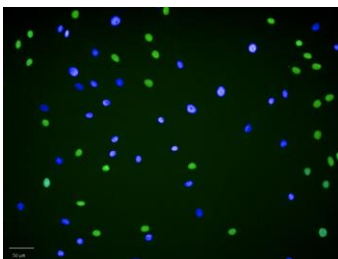

Gent 25  $\mu$ M:

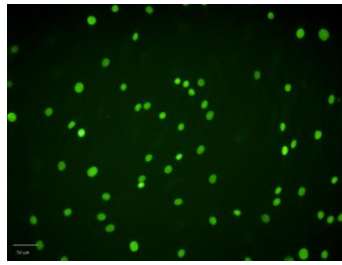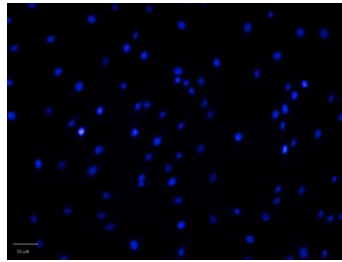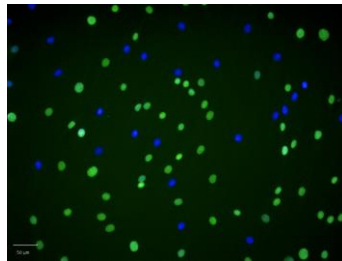

Gent 50 $\mu$ M:

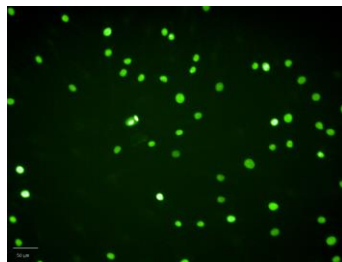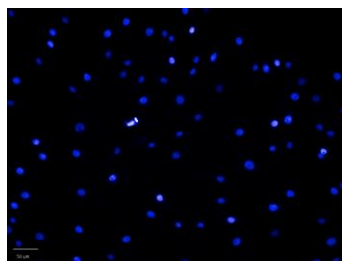

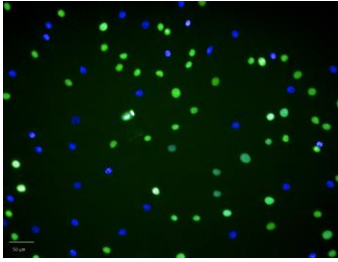

Gent 100  $\mu$ M:

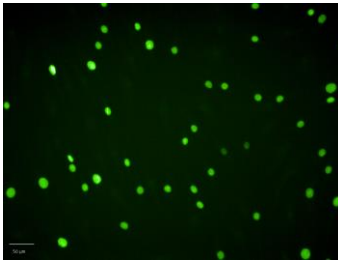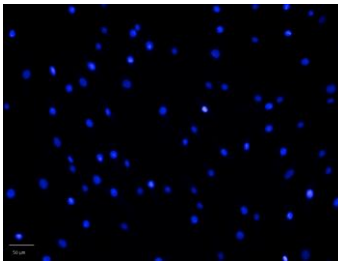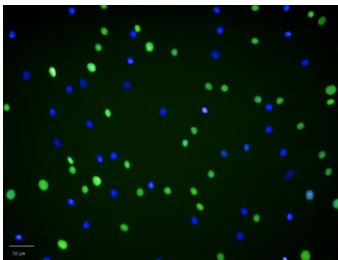

Figure 7D: The original figures of RA-FLS migration

Control:

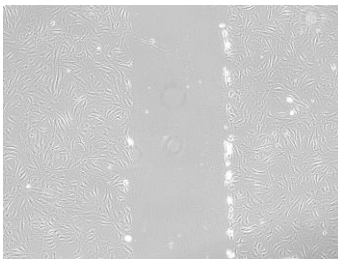

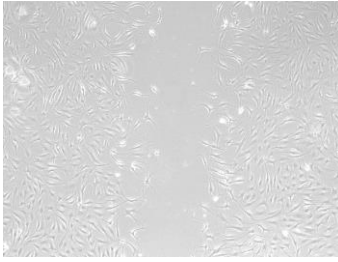

TNF- $\alpha$ :

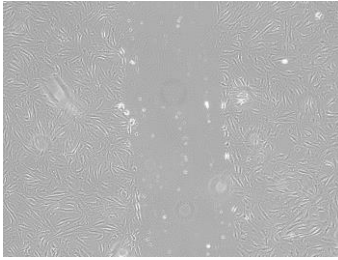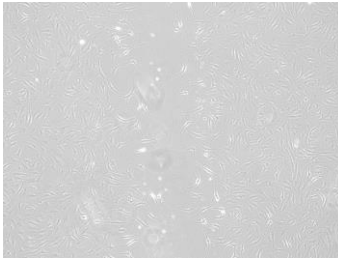

Dex 50 nM:

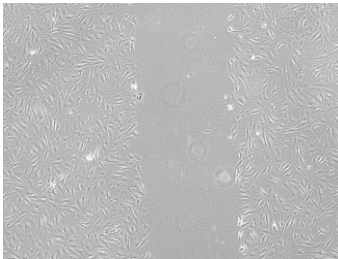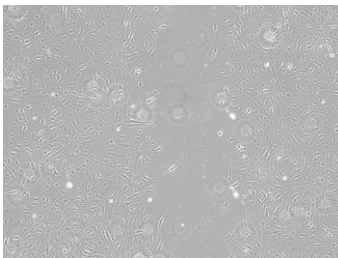

Gent 25  $\mu$ M:

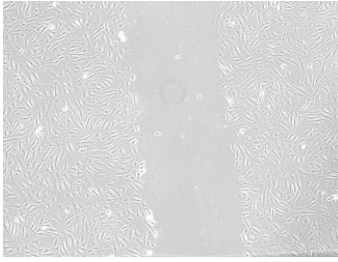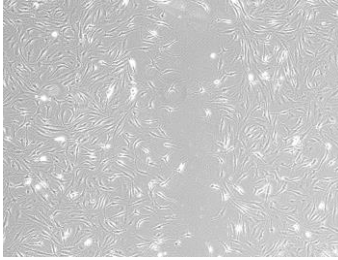

Gent 50 $\mu$ M:

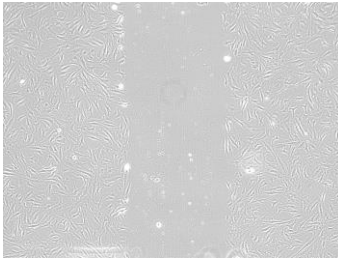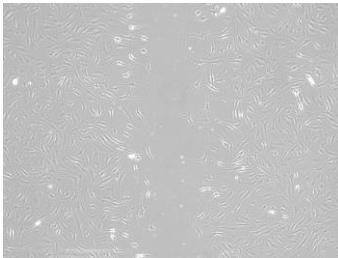

Gent 100  $\mu$ M:

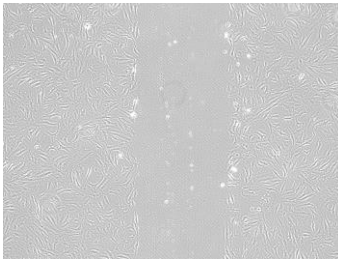

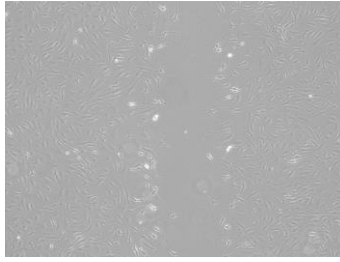

Figure 9A: The original figures of ROS

Control:

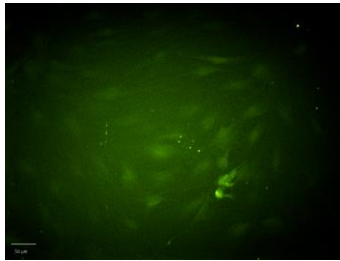

TNF- $\alpha$ :

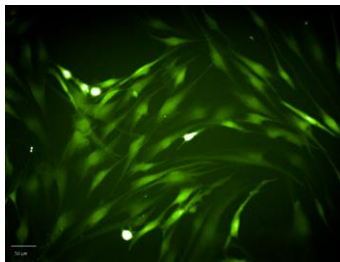

Dex 50 nM:

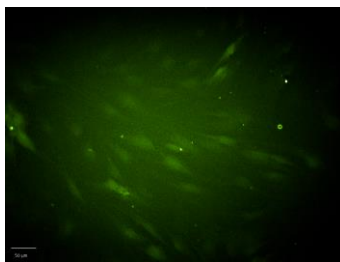

Gent 25  $\mu$ M:

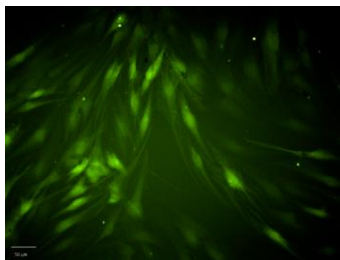

Gent 50  $\mu$ M:

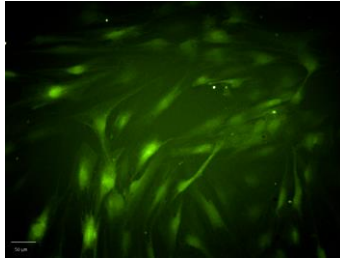

Gent 100  $\mu$ M:

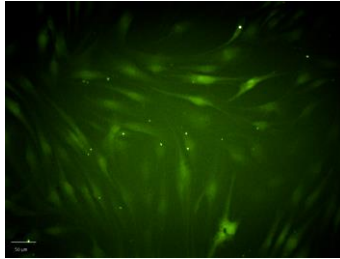

Figure 9B: The original figures of p65 nuclear translocation

Control:

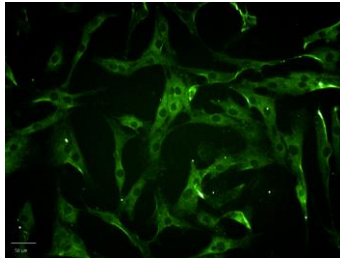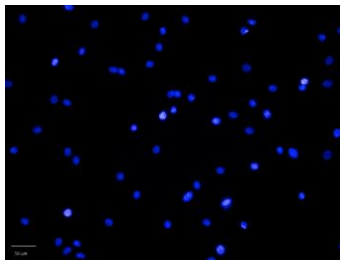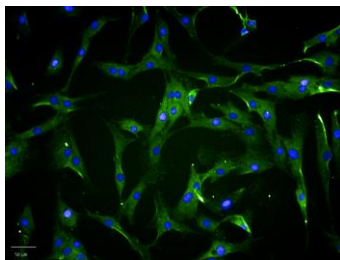

TNF- $\alpha$ :



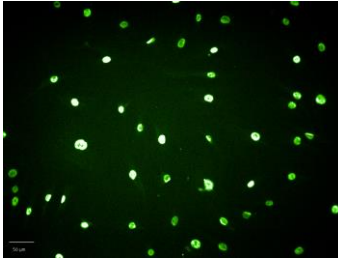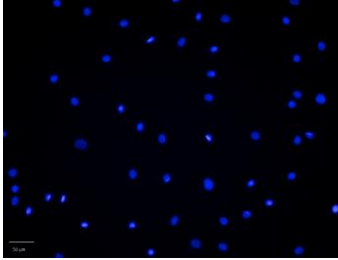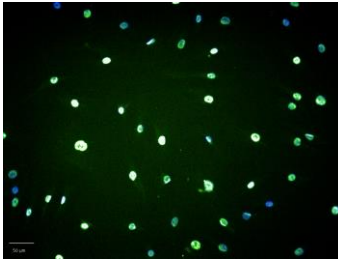

Dex 50 nM:

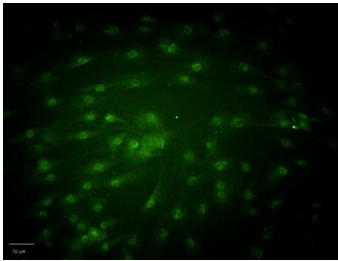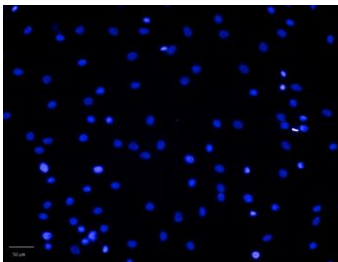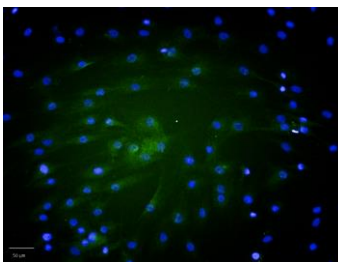

Gent 25  $\mu$ M:

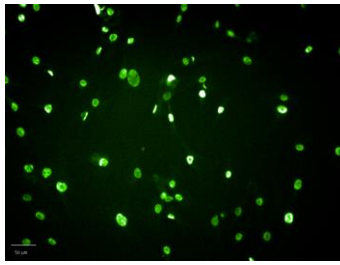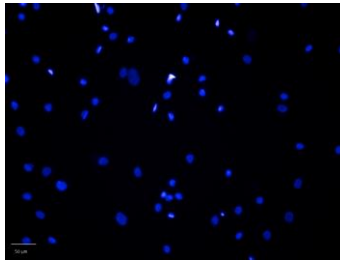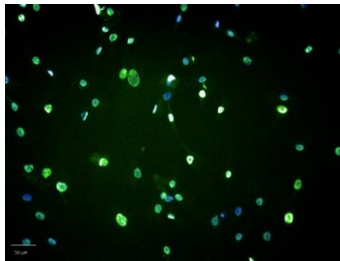

Gent 50  $\mu$ M:

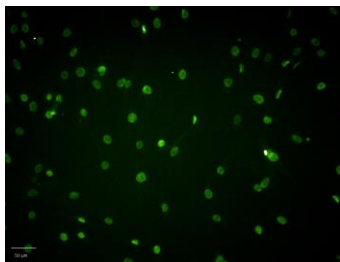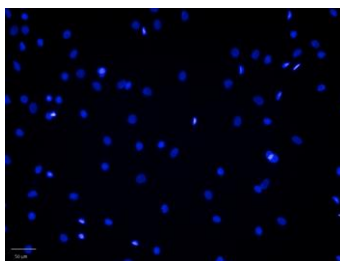

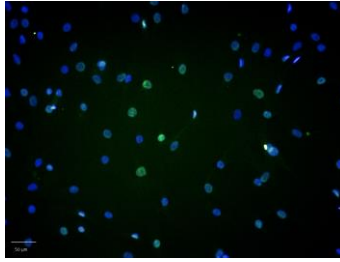

Gent 100  $\mu$ M:

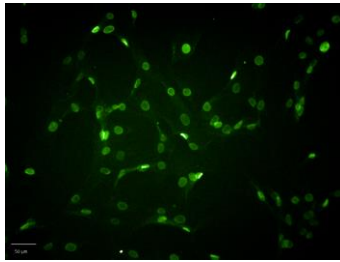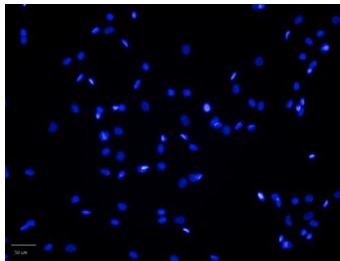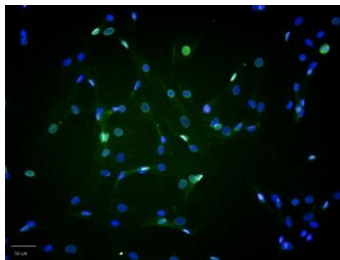

Figure 9C: The original western blots of Figure 9C

p-I $\kappa$ B $\alpha$ : Control, TNF- $\alpha$ , Dex 50 nM, Gent 25  $\mu$ M, Gent 50  $\mu$ M, Gent 100  $\mu$ M

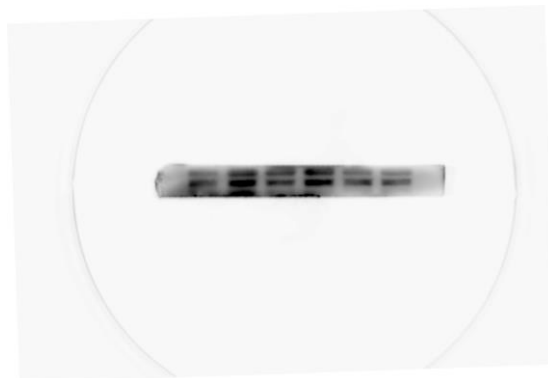

GAPDH: Control, TNF- $\alpha$ , Dex 50 nM, Gent 25  $\mu$ M, Gent 50  $\mu$ M, Gent 100  $\mu$ M

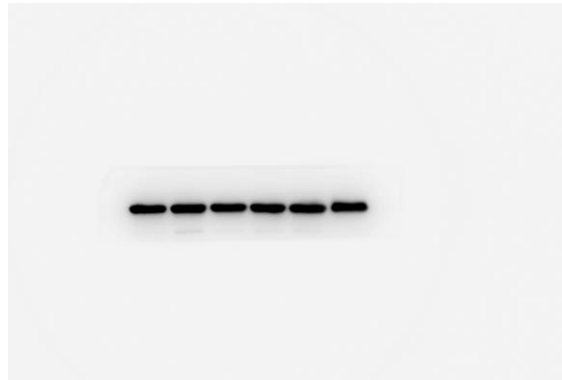

p65: Control, TNF- $\alpha$ , Dex 50 nM, Gent 25  $\mu$ M, Gent 50  $\mu$ M, Gent 100  $\mu$ M

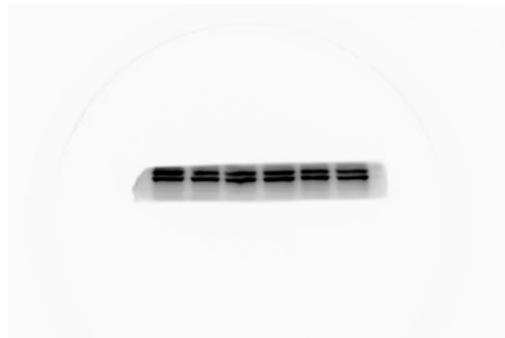

GAPDH: Control, TNF- $\alpha$ , Dex 50 nM, Gent 25  $\mu$ M, Gent 50  $\mu$ M, Gent 100  $\mu$ M

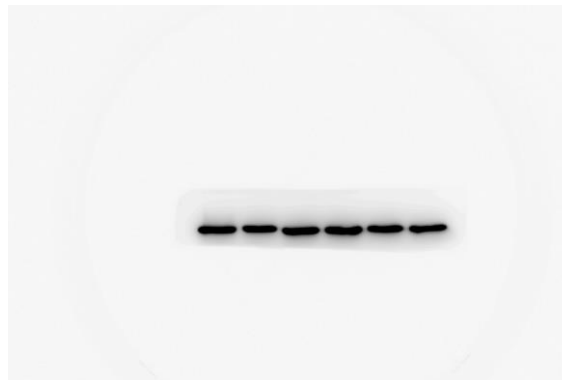

p-p65: Control, TNF- $\alpha$ , Dex 50 nM, Gent 25  $\mu$ M, Gent 50  $\mu$ M, Gent 100  $\mu$ M

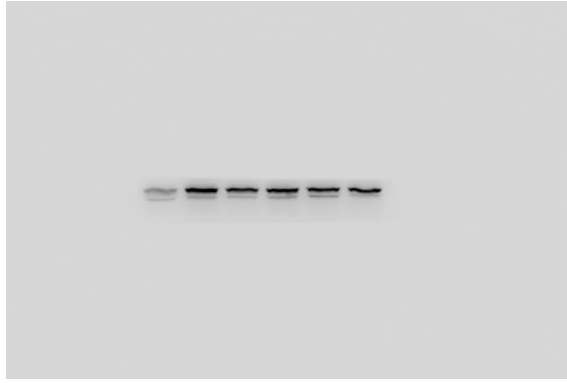

GAPDH: Control, TNF- $\alpha$ , Dex 50 nM, Gent 25  $\mu$ M, Gent 50  $\mu$ M, Gent 100  $\mu$ M

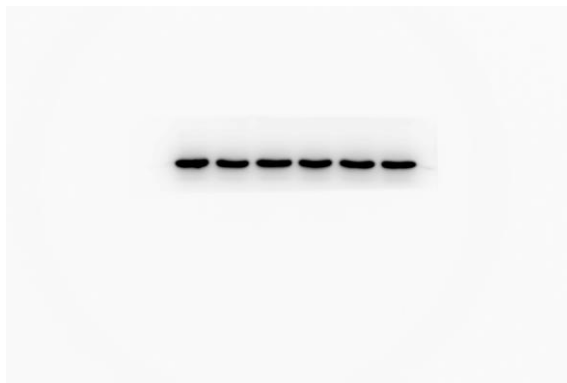

Figure 10A: The original figures of NLRP3

Control:

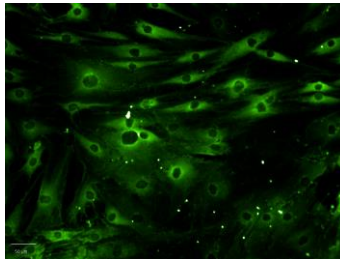

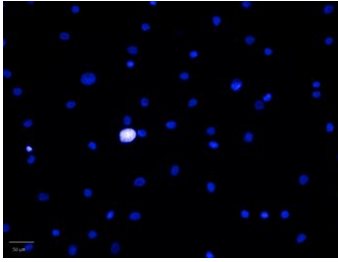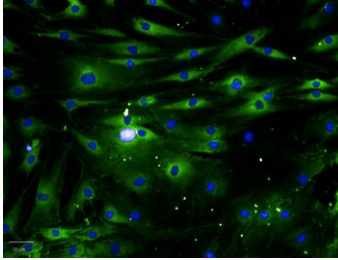

TNF- $\alpha$ :

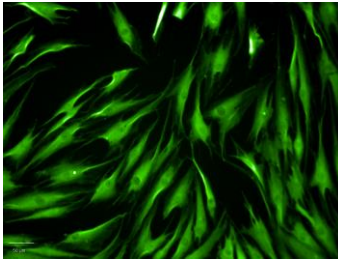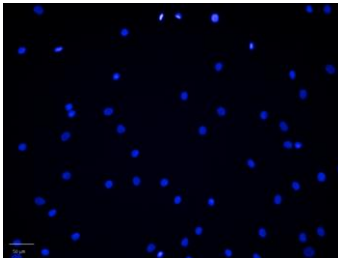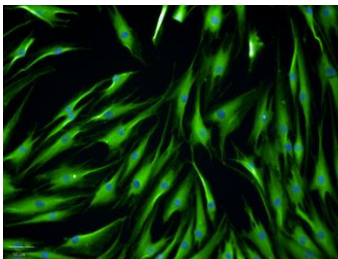

Dex 50 nM:

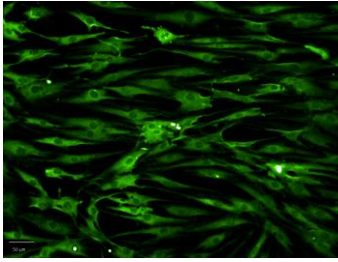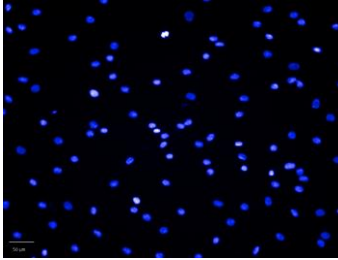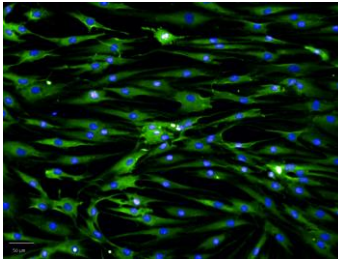

Gent 25  $\mu$ M:

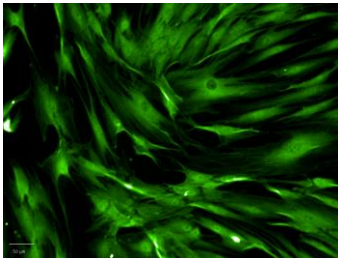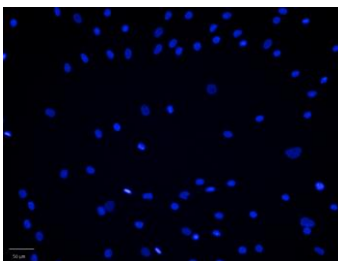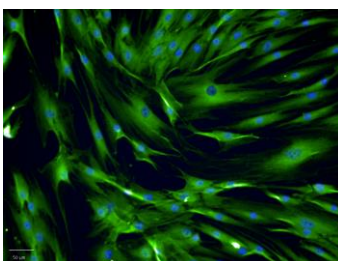

Gent 50  $\mu$ M:

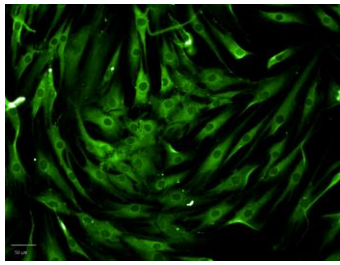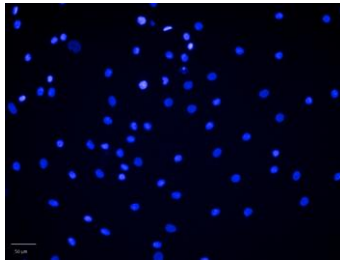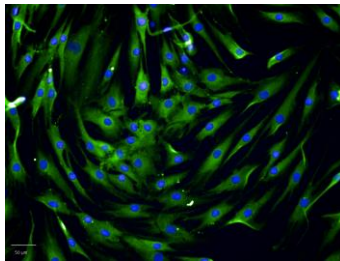

Gent 100  $\mu$ M:

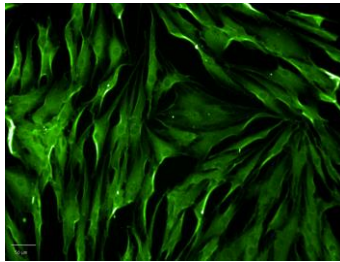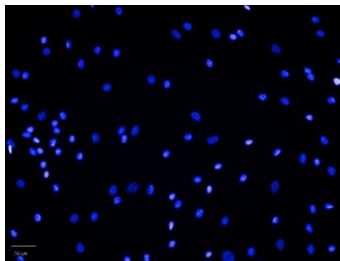



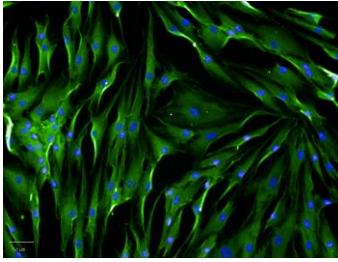

Figure 10B: The original figures of caspase-1

Control:

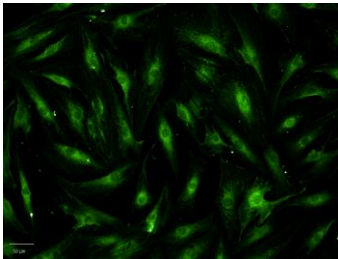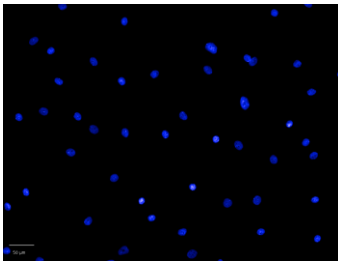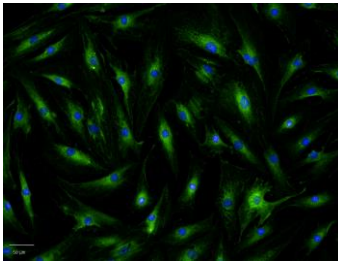

TNF- $\alpha$ :

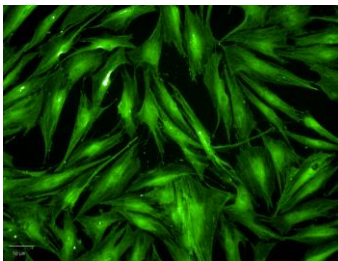

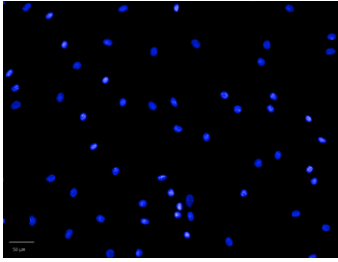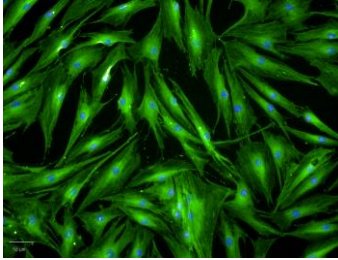

Dex 50 nM:

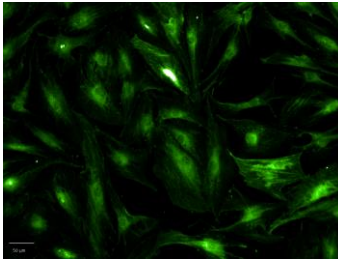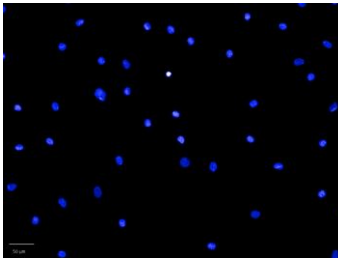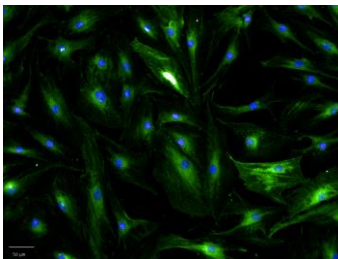

Gent 25  $\mu$ M:

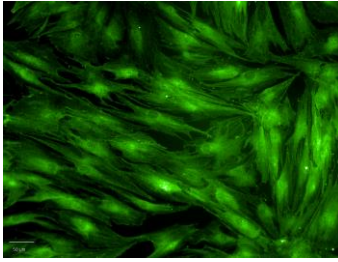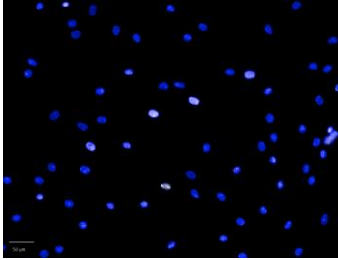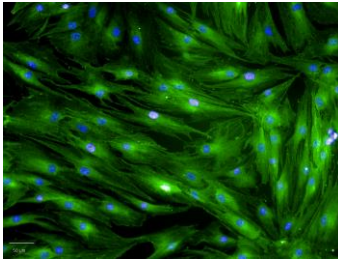

Gent 50  $\mu$ M:

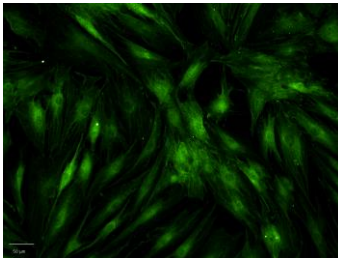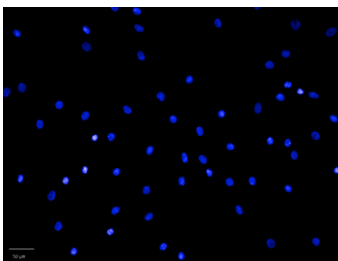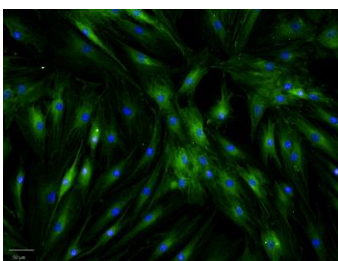

Gent 100  $\mu$ M:

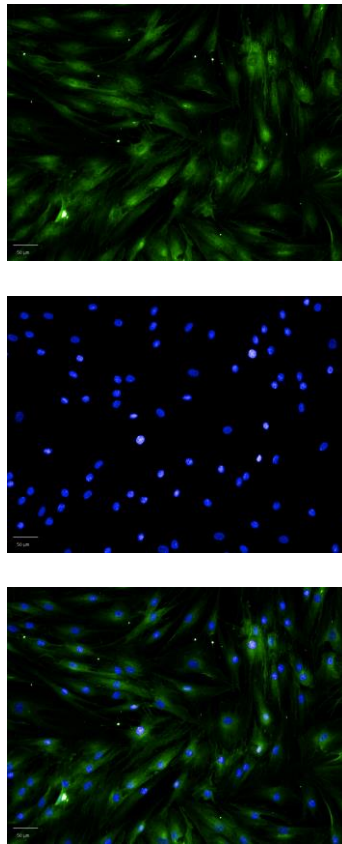

Figure 10C: The original western blots of Figure 10C

NLRP3: Control, TNF- $\alpha$ , Dex 50 nM, Gent 25  $\mu$ M, Gent 50  $\mu$ M, Gent 100  $\mu$ M

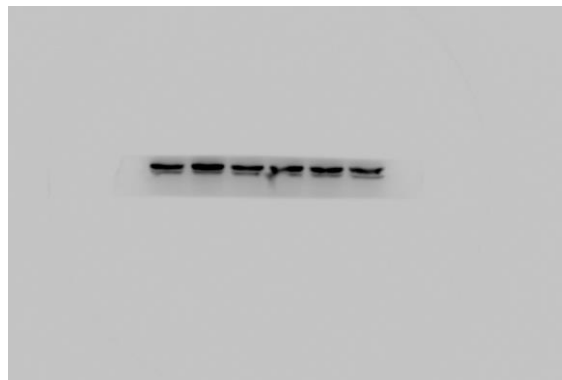

GAPDH: Control, TNF- $\alpha$ , Dex 50 nM, Gent 25  $\mu$ M, Gent 50  $\mu$ M, Gent 100  $\mu$ M

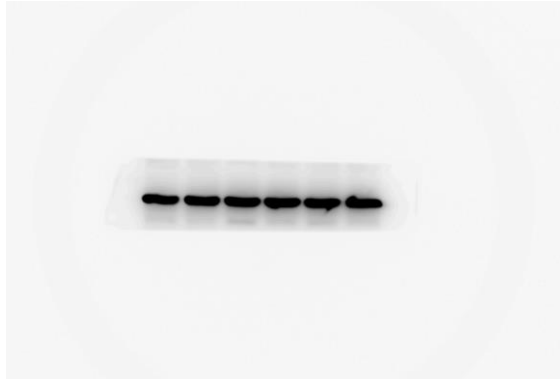

ASC: Control, TNF- $\alpha$ , Dex 50 nM, Gent 25  $\mu$ M, Gent 50  $\mu$ M, Gent 100  $\mu$ M

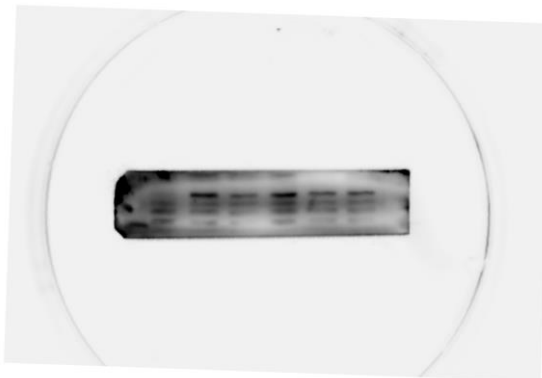

GAPDH: Control, TNF- $\alpha$ , Dex 50 nM, Gent 25  $\mu$ M, Gent 50  $\mu$ M, Gent 100  $\mu$ M

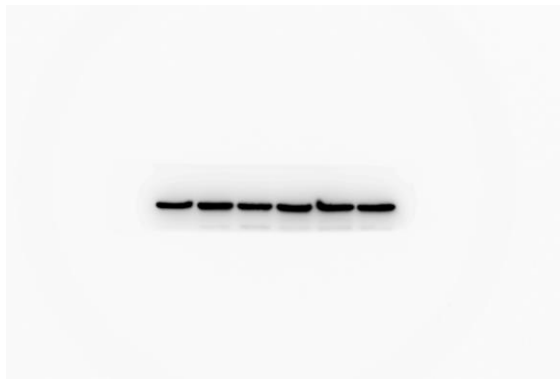

Caspase-1: Control, TNF- $\alpha$ , Dex 50 nM, Gent 25  $\mu$ M, Gent 50  $\mu$ M, Gent 100  $\mu$ M

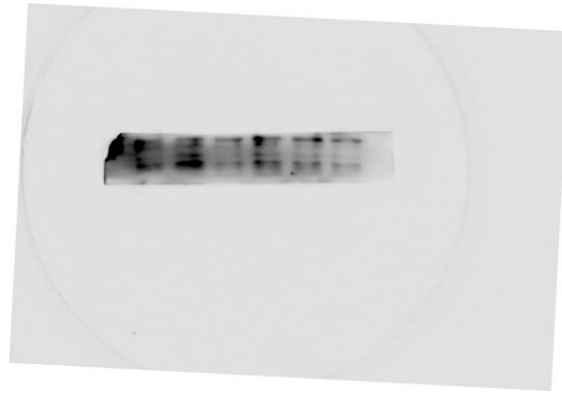

GAPDH: Control, TNF- $\alpha$ , Dex 50 nM, Gent 25  $\mu$ M, Gent 50  $\mu$ M, Gent 100  $\mu$ M

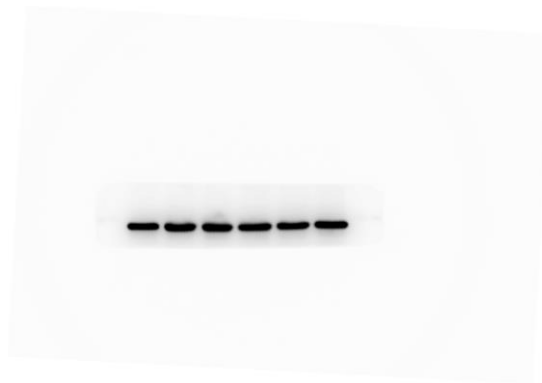

Supplement: DataSheet_3.pdf [file DataSheet_3.pdf]
